# Supplementary material for: Design and optimization of a subunit vaccine targeting COVID-19 molecular shreds using an immunoinformatics framework
Source: PubMed Central journal article supplement — RSC Adv. 2020 Sep 30;10(59):35856–72. doi: 10.1039/d0ra06849g (PMC9056885; doi:10.1039/d0ra06849g), 2020-09-30
Supplement: RA-010-D0RA06849G-s001.pdf [file RA-010-D0RA06849G-s001.pdf]

## Supporting Information

### Design and optimization of Subunit vaccine targeting the COVID- 19 molecular shreds through immunoinformatics framework

Neeraj Kumar<sup>1</sup>, Damini Sood<sup>1</sup>, Ramesh Chandra<sup>1\*</sup>

<sup>1</sup>Department of Chemistry, University of Delhi, Delhi 110007, India

#### \*Corresponding author:

Prof. Ramesh Chandra,  
Department of Chemistry, University of Delhi, Delhi- 110007, India  
Email: [rameshchandraru@gmail.com](mailto:rameshchandraru@gmail.com)

#### Infectious Spike glycoprotein [Severe acute respiratory syndrome coronavirus 2]

GenBank: QHR63290.2

>QHR63290.2 spike glycoprotein [Severe acute respiratory syndrome coronavirus 2]

MFVFLVLLPLVSSQCVNLTTRTQLPPAYTNSFTRGVYYPDKVFRSSVLHSTQDLFLPF  
FSNVTWFHAIHVSGTNGTKRFDNPVLPFNDGVYFASTEKSNIIRGWIFGTTLDSTQS  
LLIVNNATNVVIKVCEFQFCNDPFLGVYYHKNNKSWMESEFRVYSSANNCTFEYVS  
QPFLMDLEGKQGNFKNLREFVFKNIDGYFKIYSKHTPINLVRDLPQGFSALEPLVDLP  
IGINITRFQTLALHRSYLTGPDSSSGWTAGAAAYYVGYLQPRTFLLKYNENGTITDA  
VDCALDPLSEKCTKLSFTVEKGIYQTSNFRVQPTESIVRFPNITNLCPFGEVFNATRF  
ASVYAWNKRKISNCVADYSVLYNSASFSTFKCYGVSPTKLNDLCFTNVYADSFVIRG  
DEVQRQIAPGQTGKIADYNYKLPDDFTGCVIAWNSNNLDSKVGGNYNYLYRFRKSN  
LKPFERDISTEIYQAGSTPCNGVEGFNCYFPLQSYGFQPTNGVGYQPYRVVLSFELL  
HAPATVCGPKKSTNLVKNKCVNFNFNGLTGTGVLTESNKKFLPFQFGRDIADTTD  
AVRDPQTLLEILDITPCSFGGVSVITPGTNTSNQVAVLYQDVNCTEVPVAIHADQLTPT  
WRVYSTGSNVFQTRAGCLIGAEHVNNSYECDIPIGAGICASYQTQTNSPRRARSVAS  
QSIAYTMSLGAENSVAYSNNNSIAIPTNFTISVTTEILPVSMTKTSVDCTMYICGDSTEC  
SNLLLQYGSFCTQLNRALTGIAVEQDKNTQEVFAQVKQIYKTPPIKDFGGFNFSQILP  
DPSKPSKRSFIEDLLFNKVTLADAGFIKQYGDCLGDIAARDLICAQKFNGLTVLPPLLT  
DEMIAQYTSALLAGTITSGWTFGAGAALQIPFAMQMA YRFNGIGVTQNVLYENQKLI  
ANQFN SAIGKIQDSLSTASALGKLQDVVNQNAQALNTLVKQLSSNFGAISSVLNDIL  
SRLDKVEAEVQIDRLITGRLQSLQTYVTQQLIRAAEIRASANLAATKMSECVLGQSK  
RVDFCGKGYHLSFPQSAPHGVVFLHVTYVPAQEKNFTTAPAICHGDKAHFPREGV  
FVSNGTHWFVTQRNFYEPQIITDNTFVSGNCDVVIGIVNNTVYDPLQPELDSFKEEL  
DKYFKNHTSPDVDLGDISGINASVVNIQKEIDRLNEVAKNLNESLIDLQELGKYEQYI

KWPWYIWLGFIAGLIAIVMVTIMLCCMTSCCSCLKGCCSCGSCCKFDEDDSEPVLKG  
VKLHYT

### Protein sequence of lead vaccine candidate

>SARS-CoV-2 SUBUNIT VACCINE CANDIDATE (C19)

EAAAKMTPQNITDLCAEYHNTQIYTLNDKIFSYTESLAGKREMAITFKNGAIFQVEV  
PGSQHIDSQKKAIERMKDTRLRIAYLTEAKVEKLCVWNNKTPHAIAAISMANGTEAAA  
KAAYNDIISDIGFNSSVITYPDAQLVPGINGKAIHLVNNEAAYGPGPGALDPLSETKGP  
GPGNCDVVIGIVGPGPGAAYSNFGAISSVAAYGLTGTGVLTAAYKKALEPLVDLPIGI  
KKGIGVTQNVLYENKK

### Improved DNA sequence of designed vaccine construct

GAAGCTGCTGCTAAAATGACCCCGCAGAACATCACCGACCTGTGCGCTGAATAC  
CACAACACCCAGATCTACACCCTGAACGACAAAATCTTCTCTTACACGAATCTCT  
GGCTGGTAAACGTGAAATGGCTATCATCACCTTCAAAAACGGTGCTATCTTCCAG  
GTTGAAGTTCCGGGTTCTCAGCACATCGACTCTCAGAAAAAAGCTATCGAACGTA  
TGAAAGACACCCTGCGTATCGCTTACCTGACCGAAGCTAAAGTTGAAAAACTGT  
GCGTTTGAACAACAAAACCCCGCACGCTATCGCTGCTATCTCTATGGCTAACGG  
TACCGAAGCTGCTGCTAAAGCTGCTTACAACGACATCATCTCTGACATCGGTTTC  
AACTCTTCTGTTATCACCTACCCGGACGCTCAGCTGGTCCGGGTATCAACGGTA  
AAGCTATCCACCTGGTTAACAACGAAGCTGCTTACGGTCCGGGTCCGGGTGCTCT  
GGACCCGCTGTCTGAAACCAAAGGTCCGGGTCCGGGTAACTGCGACGTTGTTATC  
GGTATCGTTGGTCCGGGTCCGGGTGCTGCTTACTCTAACTTCGGTGCTATCTCTTC  
TGTTGCTGCTTACGGTCTGACCGGTACCGGTGTTCTGACCGCTGCTTACAAAAA  
GCTCTGGAACCGCTGGTTGACCTGCCGATCGGTATCAAAAAGGTATCGGTGTTA  
CCCAGAACGTTCTGTACGAAAACAAAAA

### Molecular shreds of evidence of coronavirus infectious sequence

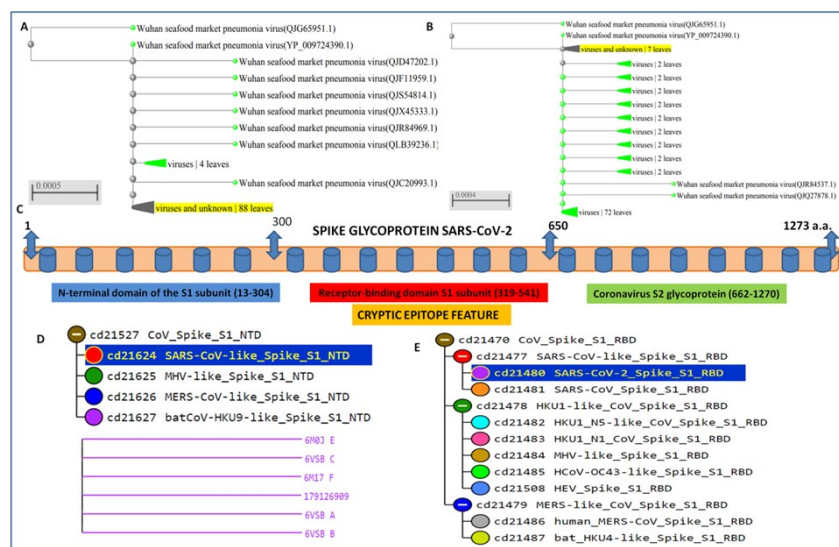

**Figure S1:** Assessment of molecular shreds of evidence of coronavirus infectious sequence (A) The protein-protein BLAST sequence analysis through the pairwise tree evaluation methods; Fast minimum evolution method and (B) Neighbor-joining method (C) The Conserved protein domain analysis of spike glycoprotein of SARS CoV-2 (D) Multiple sequence alignment of conserved domain N-terminal domain of S1 subunit of spike glycoprotein, (E) Multiple sequence alignment of conserved domain Receptor binding domain of S1 subunit.

### 3D Structural assessments of vaccine construct

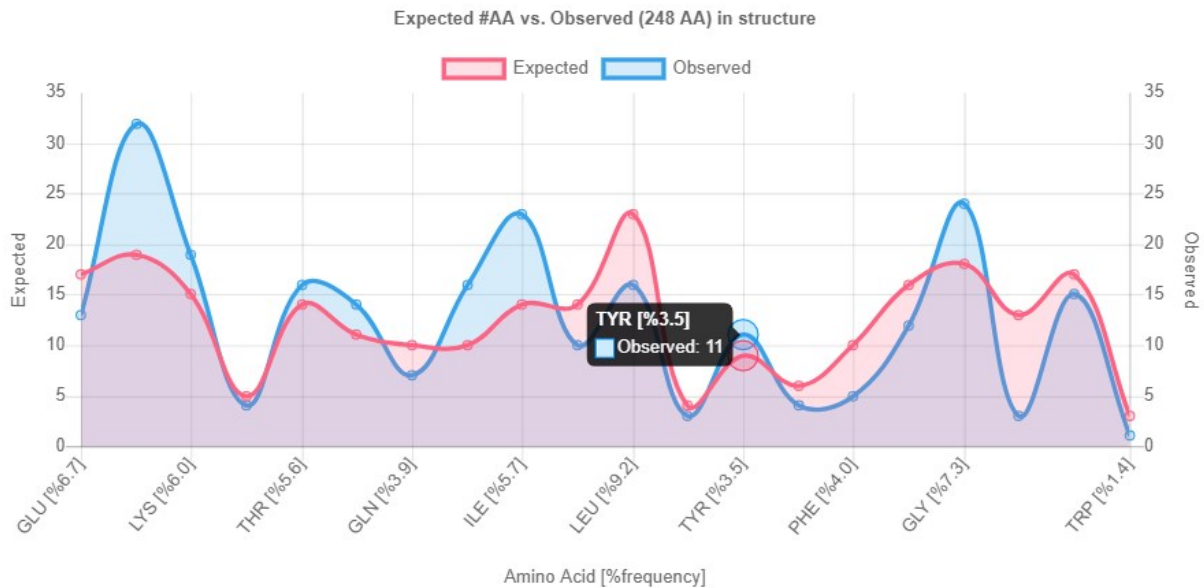

**Figure S2:** 3D structural atomic level local quality estimation of vaccine construct and comparison with known structures (NMR, X-rays based in the database). It showed the good quality of vaccine 3D structure atomic coordinates with significant resemblance to known structures.

### Atomic coordinates local quality estimation of membrane receptor TLR-2

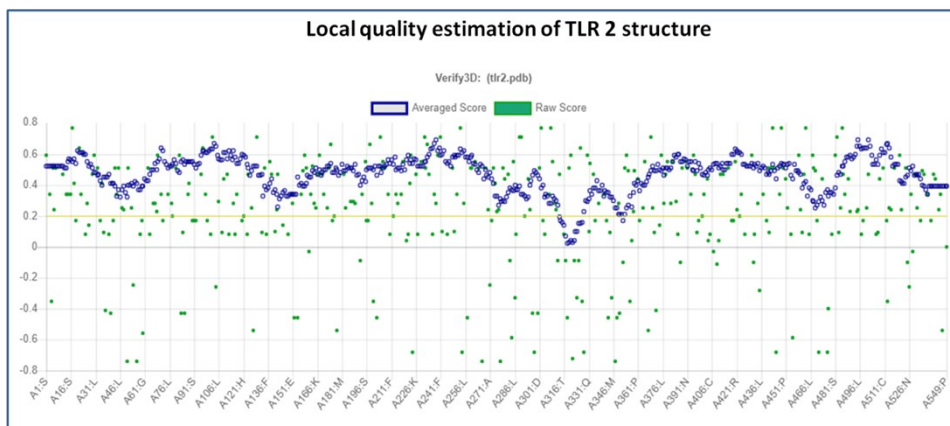

**Figure S3:** The local quality estimation of TLR-2 atomic coordinates with minimal deviations throughout the whole protein sequence.

## Energy minimized globular structure of designed vaccine construct

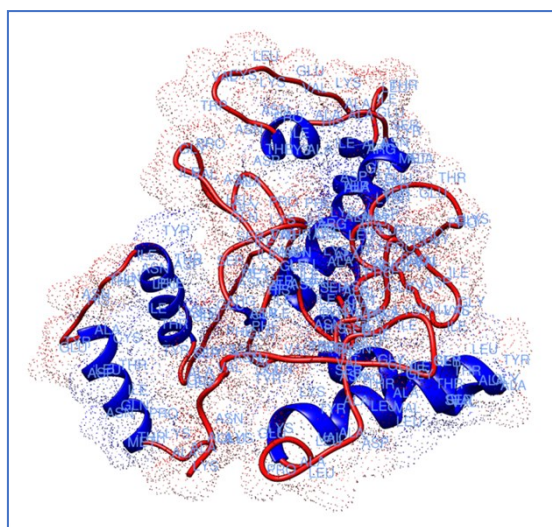

**Figure S4:** Energy minimized globular structure of developed vaccine construct by Gromacs minimizer; unwanted atoms were removed from the derived structure to minimize the redundancy in the 3D structure.

## Molecular dynamics simulation analyses of vaccine construct

The Eigen scores for the complex trajectory of vaccine and TLR-2. The Eigen score ( $3.053311e-06$ ) represents the motion stiffness of the system and correlates with the deformation of the interacting molecules.

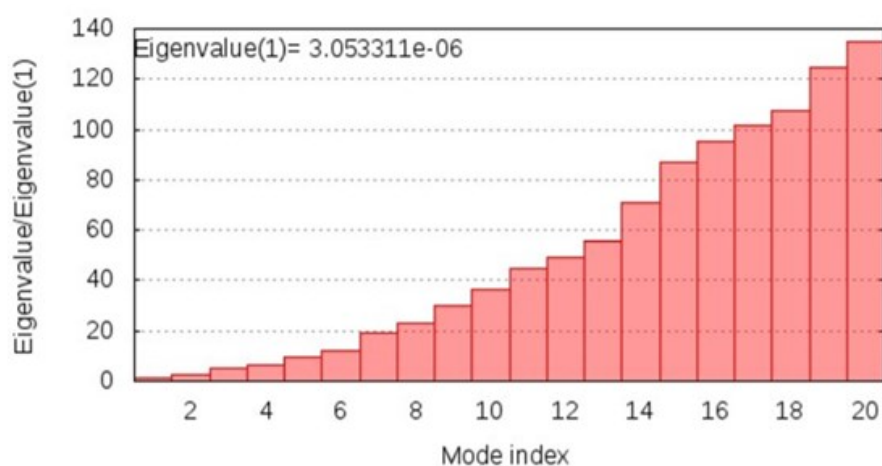

**Figure S5:** Eigenvalues assessment of the complex trajectory of vaccine construct with the TLR-2 membrane receptor.
